# Supplementary material
Source: MDPI journal article supplement (https://www.mdpi.com/2073-4441/18/2/269)
Supplement: s1 [file Supplementary Table S1.pdf › Supplementary Table S1.pdf]

**Table S1.** MLVA-8 classification of *L. pneumophila* strains from clinical and environmental samples (2012–2013).

| Strain | MLVA-8 | Location     | Sample type   | Year |
|--------|--------|--------------|---------------|------|
| O10    | GT4    | Oranim Haifa | Environmental | 2012 |
| O103   | GT4    | Oranim Haifa | Environmental | 2013 |
| O104   | GT4    | Oranim Haifa | Environmental | 2013 |
| O105   | GT4    | Oranim Haifa | Environmental | 2013 |
| O106   | GT4    | Oranim Haifa | Environmental | 2013 |
| O107   | GT4    | Oranim Haifa | Environmental | 2013 |
| O108   | GT4    | Oranim Haifa | Environmental | 2013 |
| O109   | GT4    | Oranim Haifa | Environmental | 2013 |
| O11    | GT4    | Oranim Haifa | Environmental | 2012 |
| O110   | GT4    | Oranim Haifa | Environmental | 2013 |
| O111   | GT4    | Oranim Haifa | Environmental | 2013 |
| O112   | GT4    | Oranim Haifa | Environmental | 2013 |
| O113   | GT4    | Oranim Haifa | Environmental | 2013 |
| O114   | GT4    | Oranim Haifa | Environmental | 2013 |
| O115   | GT4    | Oranim Haifa | Environmental | 2013 |
| O116   | GT4    | Oranim Haifa | Environmental | 2013 |
| O117   | GT4    | Oranim Haifa | Environmental | 2013 |

|       |     |                 |               |      |
|-------|-----|-----------------|---------------|------|
| O118  | GT4 | Oranim Haifa    | Environmental | 2013 |
| O119  | GT4 | Oranim Haifa    | Environmental | 2013 |
| O12   | GT4 | Oranim Haifa    | Environmental | 2012 |
| O120  | GT4 | Oranim Haifa    | Environmental | 2013 |
| O121  | GT4 | Oranim Haifa    | Environmental | 2013 |
| O128  | GT4 | Oranim Haifa    | Environmental | 2013 |
| O13   | GT4 | Oranim Haifa    | Environmental | 2012 |
| O2    | GT4 | Oranim Haifa    | Environmental | 2012 |
| O25   | GT4 | Oranim Haifa    | Environmental | 2012 |
| O3    | GT4 | Oranim Haifa    | Environmental | 2012 |
| O6    | GT4 | Oranim Haifa    | Environmental | 2012 |
| O75   | GT4 | Oranim Haifa    | Environmental | 2012 |
| Cl 1  | GT4 | Rambam Hospital | Clinical      | NA   |
| Cl 10 | GT4 | Rambam Hospital | Clinical      | NA   |
| Cl 4  | GT4 | Rambam Hospital | Clinical      | NA   |
| Cl 9  | GT4 | Rambam Hospital | Clinical      | NA   |
| O138  | GT6 | Oranim Haifa    | Environmental | 2013 |
| O139  | GT6 | Oranim Haifa    | Environmental | 2013 |
| O14   | GT6 | Oranim Haifa    | Environmental | 2012 |
| O146  | GT6 | Oranim Haifa    | Environmental | 2013 |

|      |     |              |               |      |
|------|-----|--------------|---------------|------|
| O147 | GT6 | Oranim Haifa | Environmental | 2013 |
| O15  | GT6 | Oranim Haifa | Environmental | 2012 |
| O16  | GT6 | Oranim Haifa | Environmental | 2013 |
| O170 | GT6 | Oranim Haifa | Environmental | 2013 |
| O171 | GT6 | Oranim Haifa | Environmental | 2013 |
| O175 | GT6 | Oranim Haifa | Environmental | 2013 |
| O177 | GT6 | Oranim Haifa | Environmental | 2013 |
| O178 | GT6 | Oranim Haifa | Environmental | 2013 |
| O18  | GT6 | Oranim Haifa | Environmental | 2012 |
| O19  | GT6 | Oranim Haifa | Environmental | 2012 |
| O21  | GT6 | Oranim Haifa | Environmental | 2012 |
| O22  | GT6 | Oranim Haifa | Environmental | 2012 |
| O23  | GT6 | Oranim Haifa | Environmental | 2012 |
| O24  | GT6 | Oranim Haifa | Environmental | 2012 |
| O28  | GT6 | Oranim Haifa | Environmental | 2012 |
| O29  | GT6 | Oranim Haifa | Environmental | 2012 |
| O32  | GT6 | Oranim Haifa | Environmental | 2012 |
| O33  | GT6 | Oranim Haifa | Environmental | 2012 |
| O34  | GT6 | Oranim Haifa | Environmental | 2012 |
| O35  | GT6 | Oranim Haifa | Environmental | 2012 |

|      |      |                 |               |      |
|------|------|-----------------|---------------|------|
| O36  | GT6  | Oranim Haifa    | Environmental | 2012 |
| O76  | GT6  | Oranim Haifa    | Environmental | 2012 |
| O93  | GT6  | Oranim Haifa    | Environmental | 2012 |
| O94  | GT6  | Oranim Haifa    | Environmental | 2012 |
| O96  | GT6  | Oranim Haifa    | Environmental | 2012 |
| Cl 5 | GT6  | Rambam Hospital | Clinical      | NA   |
| Cl 7 | GT6  | Rambam Hospital | Clinical      | NA   |
| O100 | GT15 | Oranim Haifa    | Environmental | 2013 |
| O101 | GT15 | Oranim Haifa    | Environmental | 2013 |
| O58  | GT15 | Oranim Haifa    | Environmental | 2012 |
| O59  | GT15 | Oranim Haifa    | Environmental | 2012 |
| O60  | GT15 | Oranim Haifa    | Environmental | 2012 |
| O61  | GT15 | Oranim Haifa    | Environmental | 2012 |

---
