# Supplementary material
Source: MDPI journal article supplement (https://www.mdpi.com/2073-4441/18/2/269)
Supplement: s1 [file Supplementary Table S2.pdf › Supplementary Table S2.pdf]

**Table S2.** Inter-group analysis presents common peak masses between the three MLVA-8 genotypes studied.

| Peak No. | m/z (Da) | Frequency of occurrence (n=70) | Not detected in |
|----------|----------|--------------------------------|-----------------|
| 1        | 2660     | 100%                           |                 |
| 2        | 3606     | 100%                           |                 |
| 3        | 3689     | 100%                           |                 |
| 4        | 4312     | 98.6%                          | O171 (Gt6)      |
| 5        | 4479     | 100%                           |                 |
| 6        | 4613     | 100%                           |                 |
| 7        | 4794     | 100%                           |                 |
| 8        | 4844     | 100%                           |                 |
| 9        | 5097     | 100%                           |                 |
| 10       | 5325     | 100%                           |                 |
| 11       | 6188     | 100%                           |                 |
| 12       | 6440     | 100%                           |                 |
| 13       | 7214     | 100%                           |                 |
| 14       | 7379     | 100%                           |                 |
| 15       | 8958     | 100%                           |                 |
| 16       | 9225     | 100%                           |                 |
| 17       | 9587     | 100%                           |                 |

|    |      |      |
|----|------|------|
| 18 | 9687 | 100% |
|----|------|------|

|    |       |      |
|----|-------|------|
| 19 | 10192 | 100% |
|----|-------|------|

---
